# Supplementary material
Source: PubMed Central journal article supplement (PMC1839161)

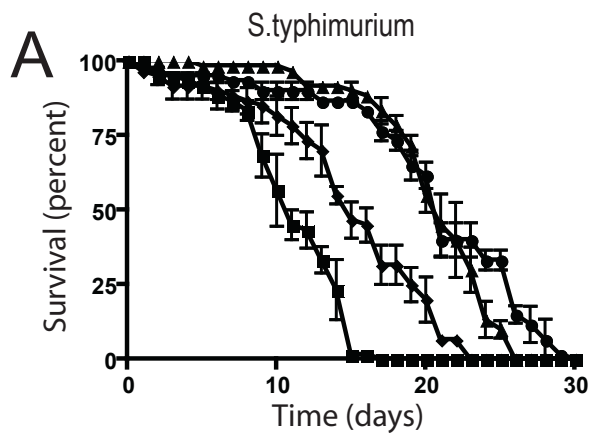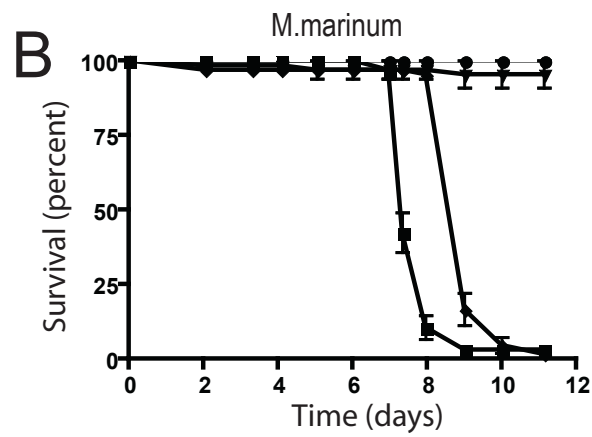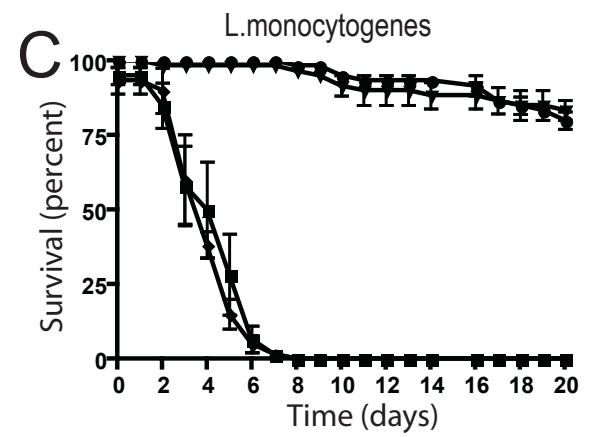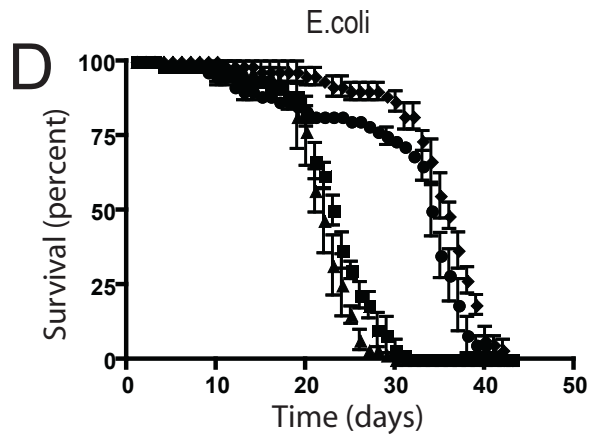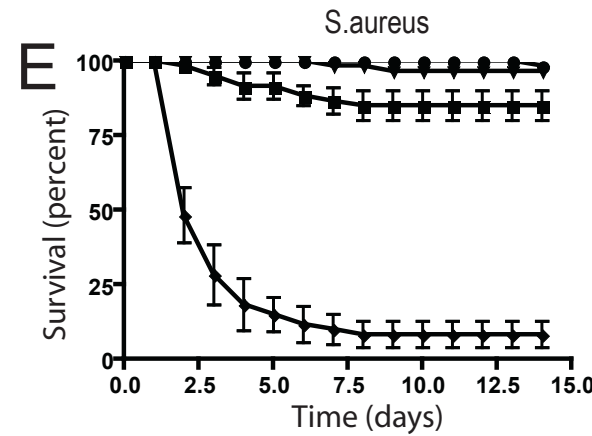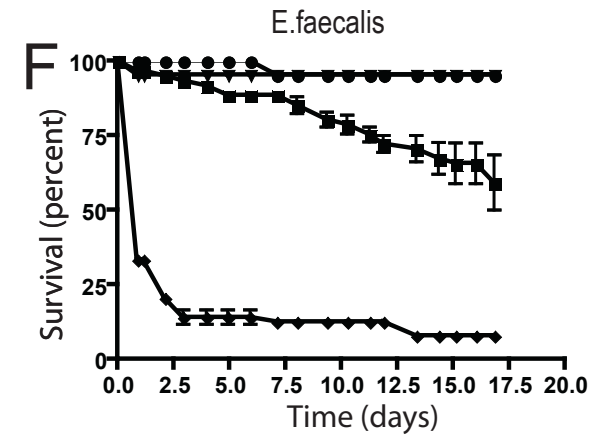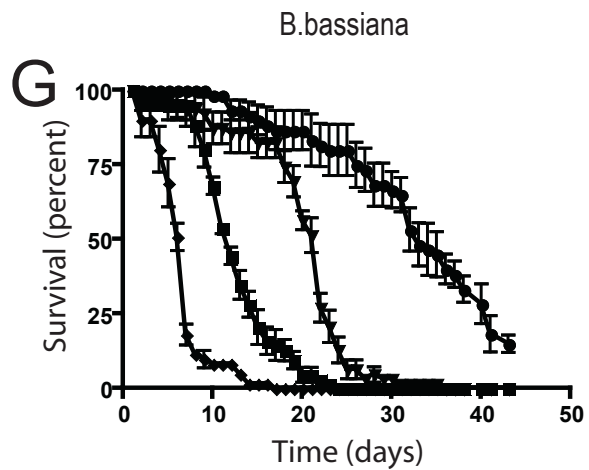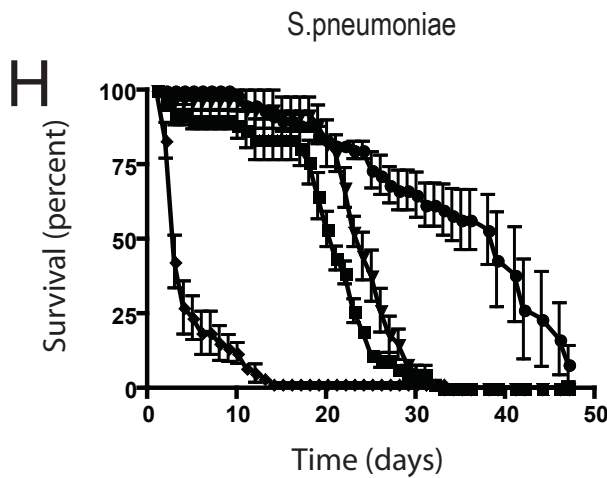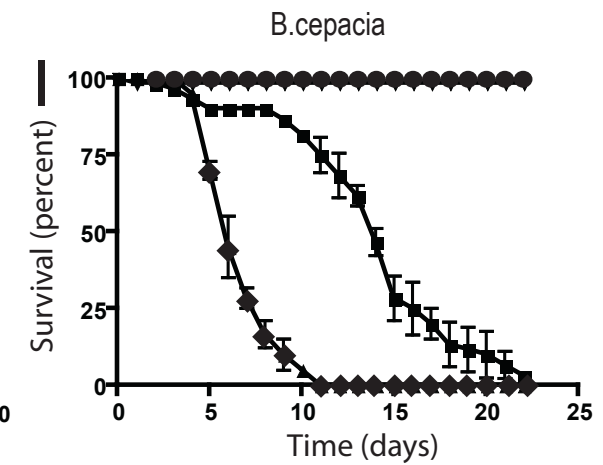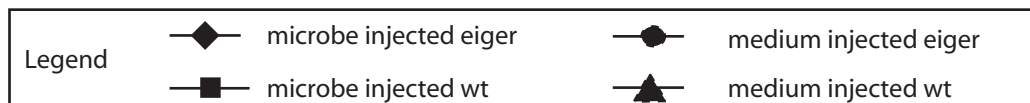

Supplement: ppat.0030041.sg001.pdf [file ppat.0030041.sg001.pdf]
